# Supplementary material
Source: PubMed Central journal article supplement (PMC2801263)
Supplement: supp_M109.054197_jbc.M109.054197-1.pdf [file supp_M109.054197_jbc.M109.054197-1.pdf]

## **Supplemental Information**

### **Supplemental Videos**

See Experimental Procedures section for the details of image acquirement.

#### **Video 1-3 (Fig. 6A, b-d)**

HEK-293-GFP-LC3 cells treated with CPP for 4 hours were lysed. Representative LC3-TVS with different topological configurations were selected and imaged every 3-5 seconds for 180 seconds. Each video recorded the movement of one particular type of LC3-TVS. Also see Figure 6 legend.

#### **Video 4 (Fig. 8)**

HEK-293-GFP-LC3 cells were grown in glass bottom culture dishes, treated with CPP for 2 hours and live cell confocal imaging was then performed in a temperature controlled, humidified environmental chamber. Images were taken every 3 minutes. Video images represent the boxed area shown in panel A of Figure 8. Also see Figure 8 legend.

### **Supplemental Table 1**

A total of 276 protein spots were detected and analyzed, among which 101 unique proteins could be clearly identified. The proteins were listed together with their location information and reported functions based on UniprotKB (protein knowledgebase, last modified February 10, 2009. Version 72). Also listed are the theoretic (theo.) and observed (Ob) *pI* and molecular weight, the priority scores and sequence coverage from mass spectrometric analysis.

**Table S1. Proteins identified in LC3-TVS**

| Protein                                                    | Accession No. | Localization          | Function               | Score | Sequence coverage (%) | Theo. MW( kDa) | Ob. MW (kDa) | Theo. PI | Ob. PI |
|------------------------------------------------------------|---------------|-----------------------|------------------------|-------|-----------------------|----------------|--------------|----------|--------|
| 26S protease regulatory subunit S10B                       | P62333        | Proteasome            | Protein degradation    | 254   | 12.6                  | 44             | 55           | 7.1      | 6.8    |
| 5'-AMP-activated protein kinase subunit gamma-1            | P54619        | Nucleus               | Metabolism             | 1020  | 24.8                  | 35             | 37           | 7.8      | 6.4    |
| 60 kDa heat shock protein, mitochondrial precursor         | P10809        | Mitochondrion         | Stress response        | 7967  | 17.1                  | 61             | 60           | 5.7      | 5      |
| 78 kDa glucose-regulated protein precursor                 | P11021        | Endoplasmic reticulum | Stress response        | 2132  | 15.4                  | 72             | 73           | 5.1      | 4.9    |
| Actin-binding Rho-activating protein                       | Q8N0Z2        | Cytoplasm             | Signal transduction    | 6087  | 21                    | 34             | 43           | 8.8      | 8.7    |
| Acyl-coenzyme A synthetase ACSM2B, mitochondrial precursor | Q68CK6        | Mitochondrion         | Metabolism             | 10820 | 14.7                  | 58             | 64           | 6.3      | 8.5    |
| Adenylate kinase isoenzyme 5                               | Q9Y6K8        | Cytoplasm             | Metabolism             | 2620  | 12.1                  | 22             | 15           | 5.4      | 7.8    |
| A-kinase anchor protein 12                                 | Q02952        | Cytoplasm             | Signal transduction    | 2212  | 6.5                   | 200            | 191          | 6.2      | 4.4    |
| Angiopietin-related protein 4 precursor                    | Q9BY76        | Secreted              | Angiogenesis           | 1593  | 19.5                  | 42             | 45           | 7.2      | 9.1    |
| Ankyrin repeat domain-containing protein 2                 | Q9GZV1        | Cytoplasm             | Structural constituent | 20.2  | 15.6                  | 37             | 40           | 5.7      | 5.7    |
| Aspartyl-tRNA synthetase, cytoplasmic                      | P14868        | Cytoplasm             | Translation            | 4105  | 21.4                  | 57             | 45           | 6.1      | 5.8    |
| Atlastin-1                                                 | Q8WXF7        | Golgi apparatus       | Membrane trafficking   | 250   | 9                     | 63             | 45           | 5.8      | 7.8    |
| ATP synthase D chain, mitochondrial                        | O75947        | Mitochondrion         | Metabolism             | 325   | 31.1                  | 18             | 22           | 5.2      | 5      |
| ATP synthase subunit alpha, mitochondrial precursor        | P25705        | Mitochondrion         | Metabolism             | 2339  | 22.8                  | 58             | 50           | 9.2      | 8.8    |
| ATP synthase subunit beta, mitochondrial precursor         | P06576        | Mitochondrion         | Metabolism             | 1835  | 23.6                  | 56             | 50           | 5.3      | 4.8    |
| AT-rich interactive domain-containing protein 5A           | Q03989        | Nucleus               | Transcription          | 4710  | 18.2                  | 64             | 55           | 9.3      | 5.6    |
| Autophagy-related protein 7                                | O95352        | Cytoplasm             | Autophagy              | 339   | 23.2                  | 77             | 100          | 5.9      | 5.7    |
| Autophagy-related protein 9A                               | Q7Z3C6        | Golgi apparatus       | Autophagy              | 12694 | 9.9                   | 94             | 75           | 6.2      | 7.5    |
| Brain development-related molecule 1                       | Q9ULP0        | Cytoplasm             | Cell differentiation   | 427   | 15.3                  | 37             | 38           | 5        | 5.8    |

|                                                              |        |                       |                        |       |      |     |     |     |     |
|--------------------------------------------------------------|--------|-----------------------|------------------------|-------|------|-----|-----|-----|-----|
| Brain-specific angiogenesis inhibitor 1-associated protein 2 | Q9UQB8 | Cytoplasmic membrane  | Cell projection        | 163   | 15.6 | 60  | 55  | 9   | 6.3 |
| BSD domain-containing protein 1                              | Q9NW68 | Unknown               | Unknown                | 465   | 13.5 | 47  | 38  | 4.4 | 8   |
| cAMP-specific 3',5'-cyclic phosphodiesterase 4A              | P27815 | Cytoplasmic membrane  | Metabolism             | 1006  | 14.3 | 98  | 110 | 5.1 | 5.9 |
| Carbonic anhydrase 4 precursor                               | P22748 | Cytoplasmic membrane  | Metabolism             | 1407  | 12.8 | 35  | 42  | 7.7 | 8.9 |
| Carboxypeptidase A5 precursor                                | Q8WXQ8 | Secreted              | Protein degradation    | 578   | 17.4 | 49  | 55  | 6.2 | 6.8 |
| Carboxypeptidase E precursor                                 | P16870 | Secreted              | Protein degradation    | 154   | 13.2 | 53  | 75  | 5   | 6.2 |
| Cartilage matrix protein precursor                           | P21941 | Secreted              | Structural constituent | 2930  | 22.4 | 50  | 53  | 7.4 | 7.8 |
| Claudin-20                                                   | P56880 | Cytoplasmic membrane  | Cell adhesion          | 590   | 31.1 | 23  | 14  | 7   | 4.5 |
| Coiled-coil domain-containing protein 109A                   | Q8NE86 | Membrane              | Unknown                | 1380  | 21.9 | 39  | 24  | 8.8 | 7.2 |
| Coiled-coil domain-containing protein 136                    | Q96JN2 | Membrane              | Unknown                | 98.3  | 6.8  | 134 | 110 | 4.6 | 4   |
| Coiled-coil domain-containing protein 76                     | Q9NUP7 | Nucleus               | Metabolism             | 180   | 15.4 | 53  | 54  | 6.5 | 8.4 |
| Collagenase 3 precursor [MMP13]                              | P45452 | Secreted              | Protein degradation    | 2356  | 19.1 | 53  | 55  | 5.3 | 5.7 |
| Cytochrome b-c1 complex subunit 2, mitochondrial             | P22695 | Mitochondrion         | Respiratory chain      | 16336 | 21.9 | 48  | 42  | 8.7 | 8.8 |
| Dual specificity protein phosphatase 9                       | Q99956 | Endoplasmic reticulum | Cell differentiation   | 1569  | 15.9 | 41  | 64  | 5.8 | 5.2 |
| EF-hand domain-containing protein 1                          | Q5JVL4 | Cytoplasm             | Cell death             | 5357  | 24.2 | 73  | 62  | 5.8 | 6   |
| Eukaryotic translation initiation factor 2 subunit 3         | P41091 | Cytoplasm             | Translation            | 128   | 12.9 | 51  | 39  | 8.7 | 6.2 |
| Forkhead box protein L2                                      | P58012 | Nucleus               | Transcription          | 974   | 6.4  | 38  | 45  | 9.3 | 9.5 |
| FtsJ methyltransferase domain containing 2                   | Q8N1G2 | Cytoplasm             | Metabolism             | 404   | 10.3 | 95  | 100 | 6.6 | 6.3 |
| Galectin-12                                                  | Q96DT0 | Nucleus               | Cell death             | 544   | 23.5 | 37  | 30  | 9.3 | 6.2 |
| Gamma-tubulin complex component 2                            | Q9BSJ2 | Centrosome            | Microtubule nucleation | 347   | 12.1 | 102 | 100 | 6.4 | 5   |
| Glutamate carboxypeptidase 2                                 | Q04609 | Cytoplasmic membrane  | Metabolism             | 5707  | 17.5 | 80  | 84  | 4.3 | 6.5 |

|                                                                                        |        |                       |                        |       |      |     |     |     |     |
|----------------------------------------------------------------------------------------|--------|-----------------------|------------------------|-------|------|-----|-----|-----|-----|
| G-rich sequence factor 1                                                               | Q12849 | Cytoplasm             | RNA binding            | 342   | 21.5 | 60  | 50  | 5   | 5.7 |
| Growth-inhibiting protein 26                                                           | Q9HBA9 | Cytoplasm             | Protein degradation    | 107   | 9.7  | 40  | 50  | 6   | 6.5 |
| Guanine nucleotide-binding protein G(k) subunit alpha [G(i)alpha3]                     | P08754 | Membrane              | Signal transduction    | 1284  | 20.3 | 40  | 50  | 5.5 | 5   |
| Guanine nucleotide-binding protein G(q) subunit alpha                                  | P50148 | Cytoplasmic membrane  | Signal transduction    | 1897  | 15   | 41  | 40  | 5.6 | 5.3 |
| Huntingtin-interacting protein 1                                                       | O00291 | Cytoplasmic membrane  | Membrane trafficking   | 132   | 5.8  | 115 | 100 | 5.2 | 5.8 |
| Ig mu heavy chain disease protein                                                      | P04220 | Cytoplasmic membrane  | Immune response        | 2669  | 16.1 | 32  | 43  | 4.2 | 5.1 |
| Importin-13                                                                            | O94829 | Cytoplasm             | Transport              | 3372  | 6    | 108 | 110 | 5.1 | 4.6 |
| Inositol-trisphosphate 3-kinase A                                                      | P23677 | Unknown               | Signal transduction    | 1295  | 16.7 | 51  | 50  | 7.6 | 6.6 |
| Kelch-like protein 30                                                                  | Q0D2K2 | Unknown               | Unknown                | 2620  | 17.6 | 64  | 63  | 5.6 | 5.7 |
| Keratin, type II cytoskeletal 8                                                        | P05787 | Cytoplasm             | Structural constituent | 401   | 15.7 | 53  | 50  | 5.5 | 4.8 |
| LC3B [MAP 1A/1B light chain 3B]                                                        | Q9GZQ8 | Cytoplasm             | Autophagy              | 1063  | 39.2 | 16  | 14  | 9.1 | 8.9 |
| Lymphoid-specific helicase                                                             | Q9NRZ9 | Nucleus               | Cell cycle             | 5748  | 10.7 | 97  | 90  | 8.1 | 6   |
| MAP3K12-binding inhibitory protein 1                                                   | Q9NS73 | Cytoplasm             | Signal transduction    | 143   | 22.4 | 39  | 32  | 6.6 | 6.4 |
| Microtubule-associated protein 9                                                       | Q49MG5 | Microtubule           | Cell cycle             | 62.9  | 8.7  | 74  | 55  | 7.6 | 6.2 |
| NACHT, LRR and PYD domains-containing protein 13                                       | Q86W25 | Cytoplasm             | Immune response        | 1331  | 9.2  | 118 | 150 | 5.4 | 6.2 |
| NADH dehydrogenase [ubiquinone] 1 alpha subcomplex subunit 10, mitochondrial precursor | O95299 | Mitochondrion         | Metabolism             | 1482  | 14.6 | 40  | 27  | 8.7 | 7.2 |
| Neuroplastin precursor                                                                 | Q9Y639 | Cytoplasmic membrane  | Cell adhesion          | 213   | 20.9 | 31  | 17  | 6.4 | 5.9 |
| Nuclear protein localization protein 4 homolog                                         | Q8TAT6 | Endoplasmic reticulum | Protein degradation    | 2806  | 10.4 | 68  | 49  | 5.9 | 6.4 |
| Pancreatic secretory granule membrane major glycoprotein GP2                           | P55259 | Membrane              | Unknown                | 241   | 13.7 | 58  | 69  | 5   | 4.5 |
| Peroxiredoxin-4                                                                        | Q13162 | Cytoplasm             | Redox regulation       | 35315 | 32.5 | 30  | 26  | 5.9 | 6.2 |
| Peroxiredoxin-6                                                                        | P30041 | Cytoplasm             | Redox regulation       | 391   | 28.1 | 34  | 25  | 7.2 | 6   |

|                                                                     |        |                       |                      |        |      |    |     |     |     |
|---------------------------------------------------------------------|--------|-----------------------|----------------------|--------|------|----|-----|-----|-----|
| Phosducin-like protein                                              | Q13371 | Cytoplasm             | Signal transduction  | 112    | 22.6 | 36 | 34  | 5.2 | 4.7 |
| PiggyBac transposable element-derived protein 2                     | Q6P3X8 | Unknown               | Unknown              | 1424   | 17.2 | 68 | 59  | 8.8 | 6.5 |
| Poly(rC)-binding protein 1                                          | Q15365 | Nucleus               | Transcription        | 281691 | 16.3 | 38 | 37  | 7.5 | 6.7 |
| Polymeric-immunoglobulin receptor precursor                         | P01833 | Cytoplasmic membrane  | Transport            | 6138   | 12.7 | 83 | 87  | 5.6 | 9.5 |
| Probable tubulin polyglutamylase                                    | O95922 | Microtubule           | Protein modification | 126    | 9    | 48 | 35  | 8.9 | 5.8 |
| Prohibitin                                                          | P35232 | Mitochondrion         | DNA replication      | 2014   | 28.7 | 29 | 30  | 5.6 | 5.6 |
| Prohibitin-2                                                        | Q99623 | Nucleus               | Transcription        | 7417   | 32.8 | 33 | 34  | 9.8 | 9.8 |
| Prolyl 3-hydroxylase 2 precursor                                    | Q8IVL5 | Endoplasmic reticulum | Redox regulation     | 723    | 13   | 80 | 100 | 5.5 | 4.7 |
| Protein disulfide-isomerase A3 precursor                            | P30101 | Endoplasmic reticulum | Redox regulation     | 718935 | 33.9 | 56 | 57  | 6   | 5.9 |
| Protein FAM83C                                                      | Q9BQN1 | Unknown               | Unknown              | 15529  | 19.3 | 81 | 85  | 8.3 | 9.1 |
| Prune homolog 2                                                     | Q8WUY3 | Cytoplasm             | Cell death           | 147    | 20.5 | 29 | 39  | 4.9 | 5.7 |
| Pyruvate dehydrogenase protein X component, mitochondrial precursor | O00330 | Mitochondrion         | Metabolism           | 792    | 15   | 54 | 50  | 8.8 | 6.4 |
| Quinone oxidoreductase-like 1                                       | O95825 | Cytoplasm             | Redox regulation     | 251    | 16.3 | 38 | 27  | 5.5 | 7.2 |
| Replication factor C subunit 2                                      | P35250 | Nucleus               | Cell cycle           | 529    | 17.2 | 39 | 50  | 6   | 6   |
| Ribosome recycling factor, mitochondrial precursor                  | Q96E11 | Mitochondrion         | Translation          | 1560   | 9.9  | 27 | 29  | 7.8 | 9.8 |
| S100 calcium-binding protein A10                                    | P60903 | Mitochondrion         | Signal transduction  | 4.46   | 23.7 | 11 | 14  | 6.8 | 7.8 |
| Septin-14                                                           | Q6ZU15 | Cytoplasm             | Cell cycle           | 140    | 20.8 | 50 | 48  | 5.9 | 5.9 |
| Signal recognition particle receptor subunit beta                   | Q9Y5M8 | Endoplasmic reticulum | Transport            | 1270   | 23.6 | 29 | 32  | 9.2 | 9   |
| Sorting nexin-25                                                    | Q9H3E2 | Endosomes             | Membrane trafficking | 57.7   | 13.4 | 62 | 62  | 5.5 | 6.5 |
| Sorting nexin-5                                                     | Q9Y5X3 | Endosomes             | Membrane trafficking | 264    | 19.6 | 50 | 46  | 6.7 | 6.3 |
| Spindlin-2B                                                         | Q9BPZ2 | Nucleus               | Cell cycle           | 4305   | 33.3 | 29 | 33  | 6.7 | 7.4 |

|                                                                                               |        |                      |                        |       |      |     |     |     |     |
|-----------------------------------------------------------------------------------------------|--------|----------------------|------------------------|-------|------|-----|-----|-----|-----|
| SWI/SNF-related matrix-associated actin-dependent regulator of chromatin subfamily C member 1 | Q92922 | Nucleus              | Transcription          | 86.9  | 5.2  | 122 | 120 | 5.6 | 6   |
| Syntaxin-binding protein 4                                                                    | Q6ZWJ1 | Cytoplasm            | Transport              | 3901  | 14.8 | 61  | 45  | 5.2 | 6.8 |
| Transcription factor 25                                                                       | Q9BQ70 | Nucleus              | Transcription          | 129   | 14.9 | 76  | 73  | 6   | 7.9 |
| Transmembrane protein 85                                                                      | Q5J8M3 | Membrane             | Unknown                | 933   | 20.8 | 20  | 17  | 8.8 | 9.1 |
| Tripartite motif-containing 21                                                                | P19474 | Cytoplasm            | Protein degradation    | 1457  | 17.7 | 54  | 55  | 6   | 6.1 |
| Tripartite motif-containing protein 10                                                        | Q9UDY6 | Cytoplasm            | Cell differentiation   | 2304  | 14.6 | 55  | 62  | 5.7 | 6.2 |
| Tripartite motif-containing protein 11                                                        | Q96F44 | Cytoplasm            | Protein degradation    | 2827  | 12.8 | 52  | 150 | 5.5 | 5.7 |
| Tyrosine-protein kinase transmembrane receptor ROR2                                           | Q01974 | Cytoplasmic membrane | Signal transduction    | 3188  | 8.4  | 95  | 104 | 6.4 | 6.1 |
| Ubiquilin-1                                                                                   | Q9UMX0 | Cytoplasm            | Protein modification   | 244   | 8.8  | 45  | 62  | 5   | 5   |
| Ubiquitin carboxyl-terminal hydrolase 10                                                      | Q14694 | Cytoplasm            | Protein degradation    | 4700  | 22.7 | 87  | 60  | 5.2 | 6.3 |
| UMP-CMP kinase                                                                                | P30085 | Cytoplasm            | Metabolism             | 1561  | 41.3 | 22  | 12  | 5.4 | 8.9 |
| Uncharacterized protein C21orf63                                                              | P58658 | Membrane             | Unknown                | 990   | 18.4 | 47  | 49  | 5.4 | 6.5 |
| Vacuolar fusion protein MON1 homolog B                                                        | Q7L1V2 | Membrane?            | Membrane trafficking?  | 6806  | 24.1 | 59  | 55  | 5.9 | 4.5 |
| Vacuolar protein sorting-associated protein 33A                                               | Q96AX1 | Endosomes            | Membrane trafficking   | 743   | 11.9 | 65  | 67  | 6.3 | 6.5 |
| Vimentin                                                                                      | P08670 | Cytoplasm            | Structural constituent | 608   | 30.5 | 55  | 53  | 5   | 5.1 |
| Voltage-dependent anion-selective channel protein 1                                           | P21796 | Mitochondrion        | Transport              | 41746 | 40.6 | 30  | 32  | 8.6 | 9.2 |
| Voltage-dependent anion-selective channel protein 2                                           | P45880 | Mitochondrion        | Transport              | 5187  | 34.4 | 31  | 34  | 7.5 | 8.2 |
| WNT1-inducible-signaling pathway protein 3 precursor                                          | O95389 | Secreted             | Signal transduction    | 379   | 17.8 | 39  | 45  | 8.9 | 8.9 |
| Zinc finger and BTB domain-containing protein 9                                               | Q96C00 | Nucleus              | Transcription          | 1788  | 13.1 | 50  | 43  | 6.3 | 7.7 |
